# Supplementary material for: The azide anion as a building block in crystal engineering from a charge density point of view
Source: Royal Society of Chemistry journal article supplement (doi:10.1039/c0ce00859a), 2011-01-01
Supplement: c0ce00859a.pdf [file c0ce00859a.pdf]

## The refinement strategy

The multipole refinement was carried out within the Hansen-Coppens formalism<sup>1</sup> using the XD program package<sup>1,2</sup>. Before each step of the refinement, C-H and N-H bond distances were normalized to the values obtained from the neutron data (1.08 and 1.05 Å, respectively).<sup>3</sup> The refinement was carried out against F (7551 merged reflections with  $I > 3\sigma(I)$ ) and converged to  $R = 0.0299$   $R_w = 0.0300$  and  $GOF = 1.2107$ . The refinement of atomic coordinates and anisotropic displacement parameters was performed against high-angle data ( $\sin\theta/\lambda > 0.7$ ), and the refinement of all other parameters was performed against all data. For all non-hydrogen atoms coordinates, anisotropic thermal displacement parameters, monopoles, dipoles, octupoles and kappas were refined. For hydrogen atoms only monopole and D10 dipole term were refined. For N-H hydrogen atoms the H40 hexadecapole term was included in the refinement for better description of strong hydrogen bonds according to XD2006 user manual.

The multipole refinement strategy can be described as follows:

Let's denote 4 steps of least-squares refinement of a *parameter set* as **LS**(*parameter set*)

Let's denote the following cycle

1. **LS**(multipole parameters)
  2. **LS**(coordinates and anisotropic thermal displacement parameters)
- repeated until R stops decreasing

as **C1**.

Then the refinement strategy employed for DCDA can be written as follows:

**C1**  
**LS**(monopoles and first-order kappas)  
**C1**  
**LS**(second-order kappas)  
**C1**  
**LS**(overall scale factor)  
**C1**  
**LS**(monopoles and first-order kappas)  
**C1**

After this refinement was performed, repeating of any of its steps did not lead to deviation from obtained parameters and/or decrease of R. The total electron density function

was positive everywhere and the values of residual electron density were in the range from -0.20 to 0.23 e·Å<sup>-3</sup>. The differences of mean-square displacement amplitudes of non-hydrogen atoms along covalent bonds did not exceed 1·10<sup>-3</sup> Å<sup>2</sup>, satisfying the Hirshfeld test.<sup>4</sup>

### References:

1. N. K. Hansen and P. Coppens, *Acta Cryst. Sect. A*, 1978, **34**, 909-921.
2. Z. Su and P. Coppens, *Acta Cryst. Sect. A*, 1998, **54**, 646-652.
3. A. E. Cohen, B. M. Craven, and W. T. Klooster, *Acta Cryst. Sect. B*, 1997, **53**, 787-794.
4. F. L. Hirshfeld, *Theoretica Chimica Acta*, 1977, **44**, 129-138.
5. E. Espinosa, C. Lecomte, and E. Molins, *Chem. Phys. Lett.*, 1999, **300**, 745-748.
6. E. Espinosa, E. Molins, and C. Lecomte, *Chem. Phys. Lett.*, 1998, **285**, 170-173.

**Table S1. Summary of bonding contacts with azide anion in DCDA**

| Atom1 | Atom2 | Symmetry operation* | d, Å      | $\rho(r)$ , e·Å <sup>-3</sup> | $\nabla^2\rho(r)$ , e·Å <sup>-5</sup> | $h_e(r)$ , a.u. | $v(r)$ , a.u. | E (kcal/mol)** |
|-------|-------|---------------------|-----------|-------------------------------|---------------------------------------|-----------------|---------------|----------------|
| N(2)  | H(2A) | 1_555               | 2.51      | 0.059                         | 0.94                                  | 0.0022          | -0.005        | -1.7           |
| N(2)  | H(1A) | 2_656               | 2.58      | 0.024                         | 0.34                                  | 0.0007          | -0.004        | -1.2           |
| N(2)  | H(5B) | 3_557               | 2.58      | 0.025                         | 0.37                                  | 0.0007          | -0.004        | -1.3           |
| N(2)  | H(4B) | 4_555               | 2.52      | 0.023                         | 0.35                                  | 0.0007          | -0.004        | -1.2           |
| N(2)  | H(2N) | 1_555               | 1.82      | 0.217                         | 3.07                                  | 0.0013          | -0.029        | -9.2           |
| N(4)  | H(2B) | 1_565               | 2.48      | 0.026                         | 0.38                                  | 0.0007          | -0.004        | -1.4           |
| N(4)  | C(3)  | 3_557               | 3.2895(6) | 0.021                         | 0.28                                  | 0.0006          | -0.003        | -0.9           |
| N(4)  | H(4A) | 3_557               | 2.87      | 0.016                         | 0.24                                  | 0.0005          | -0.002        | -0.8           |
| N(4)  | H(1N) | 3_657               | 1.86      | 0.109                         | 1.43                                  | 0.0007          | -0.025        | -7.9           |
| N(3)  | H(6A) | 4_565               | 2.53      | 0.027                         | 0.40                                  | 0.0008          | -0.004        | -1.3           |

\*Estimated within Espinosa-Lecomte-Molins correlation scheme (see above ref. <sup>5,6</sup>)

\*\*Summary of symmetry operations:

1\_555: 'x, y, z'

2\_555: '-x, y+1/2, -z+1/2'

3\_555: '-x, -y, -z'

4\_555: 'x, -y-1/2, z-1/2'

**Table S2.** The integrated values of electron population, volume and lagrangian of electron density for atomic basins of DCDA according to topological analysis of experimental  $\rho(\mathbf{r})$

| Atom              | $\rho(\Omega)$ , a.u | $V(\Omega)$ , Å <sup>3</sup> | $L(\Omega)*10^4$ , a.u. |
|-------------------|----------------------|------------------------------|-------------------------|
| O(1)              | 8.951                | 13.589                       | 0.83                    |
| O(2)              | 8.923                | 13.845                       | 1.71                    |
| N(1)              | 8.088                | 12.413                       | -3.78                   |
| N(2)              | 7.245                | 16.645                       | -0.10                   |
| N(3)              | 7.146                | 12.405                       | -0.13                   |
| N(4)              | 7.186                | 17.635                       | -0.66                   |
| C(1)              | 5.956                | 9.170                        | -4.99                   |
| C(2)              | 5.698                | 8.802                        | -0.75                   |
| C(3)              | 5.646                | 8.048                        | -5.17                   |
| C(4)              | 5.646                | 8.539                        | -1.84                   |
| C(5)              | 5.689                | 8.413                        | -1.74                   |
| C(6)              | 5.840                | 8.487                        | -4.51                   |
| H(2N)             | 0.600                | 2.759                        | -0.19                   |
| H(1N)             | 0.579                | 2.675                        | -0.88                   |
| H(1B)             | 0.870                | 5.992                        | -0.25                   |
| H(1A)             | 0.903                | 5.521                        | -0.54                   |
| H(2B)             | 0.881                | 7.095                        | -0.28                   |
| H(2A)             | 0.941                | 6.160                        | -0.58                   |
| H(3B)             | 0.912                | 6.056                        | -0.36                   |
| H(3A)             | 0.882                | 8.189                        | -0.35                   |
| H(4B)             | 0.872                | 6.460                        | -0.36                   |
| H(4A)             | 0.899                | 6.937                        | -0.41                   |
| H(5B)             | 0.889                | 6.989                        | 0.32                    |
| H(5A)             | 0.926                | 5.888                        | -0.42                   |
| H(6B)             | 0.908                | 8.316                        | -0.43                   |
| H(6A)             | 0.905                | 6.162                        | -0.51                   |
| <b>Total</b>      | 93.983               | 223.188                      | -26.37                  |
| <b>Calculated</b> | 94.000               | 224.6775                     |                         |
| <b>Difference</b> | -0.017               | -1.489                       |                         |

### References:

1. N. K. Hansen and P. Coppens, *Acta Cryst. Sect. A*, 1978, **34**, 909-921.
2. Z. Su and P. Coppens, *Acta Cryst. Sect. A*, 1998, **54**, 646-652.
3. A. E. Cohen, B. M. Craven, and W. T. Klooster, *Acta Cryst. Sect. B*, 1997, **53**, 787-794.
4. F. L. Hirshfeld, *Theoretica Chimica Acta*, 1977, **44**, 129-138.
5. E. Espinosa, C. Lecomte, and E. Molins, *Chem. Phys. Lett.*, 1999, **300**, 745-748.
6. E. Espinosa, E. Molins, and C. Lecomte, *Chem. Phys. Lett.*, 1998, **285**, 170-173.

### Multipole refinement

Table S3. Monopole Populations, Radial Parameters and Net Atomic Charges.

| Atom  | Pval  | Kappa | P00   | Kappa' | Net charge |
|-------|-------|-------|-------|--------|------------|
| O(1)  | 6.312 | 0.985 | 0.000 | 0.976  | -0.31210   |
| O(2)  | 6.276 | 0.985 | 0.000 | 0.976  | -0.27610   |
| N(1)  | 5.194 | 0.988 | 0.000 | 1.005  | -0.19400   |
| N(2)  | 5.407 | 0.974 | 0.000 | 1.017  | -0.40750   |
| N(3)  | 4.979 | 1.014 | 0.000 | 0.964  | +0.02070   |
| N(4)  | 5.335 | 0.974 | 0.000 | 1.017  | -0.33470   |
| C(1)  | 4.122 | 1.006 | 0.000 | 1.003  | -0.12220   |
| C(2)  | 4.006 | 1.010 | 0.000 | 0.977  | -0.00580   |
| C(3)  | 4.000 | 1.010 | 0.000 | 0.977  | -0.00050   |
| C(4)  | 3.957 | 1.010 | 0.000 | 0.977  | +0.04290   |
| C(5)  | 4.038 | 1.010 | 0.000 | 0.977  | -0.03810   |
| C(6)  | 4.028 | 1.006 | 0.000 | 1.003  | -0.02760   |
| H(2N) | 0.804 | 1.200 | 0.000 | 1.200  | +0.19580   |
| H(1N) | 0.794 | 1.200 | 0.000 | 1.200  | +0.20580   |
| H(1B) | 0.883 | 1.200 | 0.000 | 1.200  | +0.11720   |
| H(1A) | 0.907 | 1.200 | 0.000 | 1.200  | +0.09340   |
| H(2B) | 0.879 | 1.200 | 0.000 | 1.200  | +0.12110   |
| H(2A) | 0.927 | 1.200 | 0.000 | 1.200  | +0.07310   |
| H(3B) | 0.891 | 1.200 | 0.000 | 1.200  | +0.10940   |
| H(3A) | 0.885 | 1.200 | 0.000 | 1.200  | +0.11480   |
| H(4B) | 0.873 | 1.200 | 0.000 | 1.200  | +0.12710   |
| H(4A) | 0.890 | 1.200 | 0.000 | 1.200  | +0.10950   |
| H(5B) | 0.883 | 1.200 | 0.000 | 1.200  | +0.11700   |

|        |       |       |       |       |          |
|--------|-------|-------|-------|-------|----------|
| H (5A) | 0.909 | 1.200 | 0.000 | 1.200 | +0.09080 |
| H (6B) | 0.906 | 1.200 | 0.000 | 1.200 | +0.09420 |
| H (6A) | 0.914 | 1.200 | 0.000 | 1.200 | +0.08600 |

---

**Table S4. Dipole Population Parameters.**

| Atom   | D11+        | D11-        | D10         | Kappa ' |
|--------|-------------|-------------|-------------|---------|
| O (1)  | -0.015 (6)  | -0.050 (6)  | -0.040 (6)  | 0.976   |
| O (2)  | 0.006 (6)   | -0.074 (6)  | -0.061 (6)  | 0.976   |
| N (1)  | -0.009 (7)  | 0.024 (7)   | 0.025 (7)   | 1.005   |
| N (2)  | 0.035 (7)   | 0.009 (7)   | -0.041 (7)  | 1.017   |
| N (3)  | 0.012 (7)   | -0.014 (7)  | -0.033 (9)  | 0.964   |
| N (4)  | -0.006 (7)  | -0.021 (7)  | -0.070 (8)  | 1.017   |
| C (1)  | -0.028 (9)  | 0.056 (9)   | 0.022 (9)   | 1.003   |
| C (2)  | -0.059 (9)  | 0.022 (10)  | 0.028 (10)  | 0.977   |
| C (3)  | 0.026 (10)  | 0.086 (10)  | -0.008 (10) | 0.977   |
| C (4)  | -0.035 (10) | 0.053 (10)  | 0.035 (10)  | 0.977   |
| C (5)  | 0.037 (10)  | -0.019 (10) | 0.052 (10)  | 0.977   |
| C (6)  | 0.019 (9)   | 0.049 (10)  | -0.012 (10) | 1.003   |
| H (2N) | 0.000       | 0.000       | 0.145 (11)  | 1.200   |
| H (1N) | 0.000       | 0.000       | 0.160 (11)  | 1.200   |
| H (1B) | 0.000       | 0.000       | 0.138 (11)  | 1.200   |
| H (1A) | 0.000       | 0.000       | 0.128 (11)  | 1.200   |
| H (2B) | 0.000       | 0.000       | 0.134 (11)  | 1.200   |
| H (2A) | 0.000       | 0.000       | 0.131 (11)  | 1.200   |
| H (3B) | 0.000       | 0.000       | 0.088 (11)  | 1.200   |
| H (3A) | 0.000       | 0.000       | 0.134 (11)  | 1.200   |
| H (4B) | 0.000       | 0.000       | 0.137 (11)  | 1.200   |









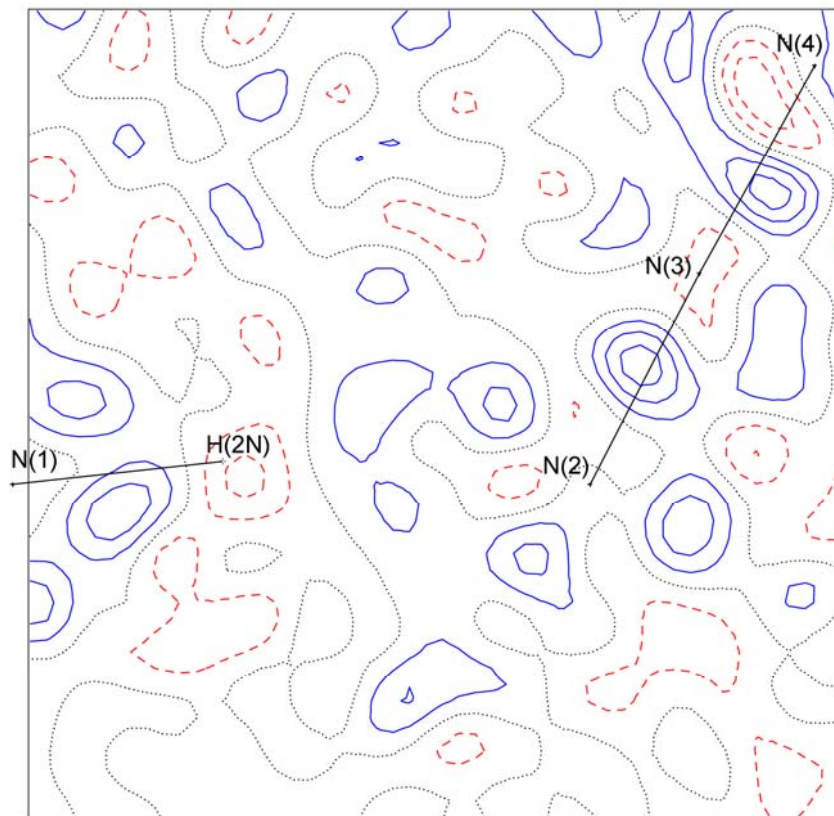

**Figure S1.** The map of residual electron density in N(1)-N(2)-N(3) plane, step size  $0.05 \text{ e} \cdot \text{\AA}^{-3}$ . Positive contours are solid blue, zero ones are dotted grey, negative ones are dashed red.
